# Supplementary material
Source: PubMed Central journal article supplement (PMC3566445)
Supplement: mmc1.pdf [file mmc1.pdf]

# **Energy for Wild-Type Acetylcholine Receptor Channel Gating from Different Choline Derivatives**

Iva Bruhova,<sup>†</sup> Timothy Gregg,<sup>‡</sup> and Anthony Auerbach<sup>†\*</sup>

<sup>†</sup>Department of Physiology and Biophysics, SUNY at Buffalo, Buffalo, New York; and <sup>‡</sup>Department of Chemistry and Biochemistry, Canisius College, Buffalo, New York

Bruhova et al.

Submitted July 20, 2012, and accepted for publication November 27, 2012.

Editor: Chris Lingle.

\*Correspondence: [auerbach@buffalo.edu](mailto:auerbach@buffalo.edu)

## Supplementary Information

### Standard procedure for quaternization of amines

Reactions were carried out under an atmosphere of dry argon. Anhydrous acetonitrile and other (reagent grade) solvents were obtained commercially. The tertiary amine substrates, bromoalkanes, trimethylamine, and methyl tosylate were obtained from Aldrich. NMR spectra were recorded, using acetonitrile- $d_3$  as solvent, on a Bruker Avance 250 spectrometer. Spectra were calibrated to residual proton resonances from the solvent. Elemental analyses were performed by Atlantic MicroLabs, Atlanta, GA.

Quaternization was carried out in anhydrous acetonitrile (1 mmol/mL). To create a tosylate salt form, the tertiary amine was treated with methyl tosylate (1 equivalent). To create a bromide salt form, the bromoalkane was treated with anhydrous trimethylamine (1.5 equivalent). After stirring at room temp for 1-2 h, the reaction mixture was diluted 3-fold with diethyl ether. The white solid was collected and washed on the filter with a small volume of diethyl ether, then dried under vacuum for 2 h. Recrystallization from ethyl acetate/ethanol gave the product as colorless crystals.

**3-hydroxypropyltrimethylammonium tosylate (3OH-PTMA):** Prepared from 0.88 g (8.5 mmol) of 3-dimethylamino-1-propanol as described above. Yield: 1.13 g (3.9 mmol, 46%);  $^1\text{H}$  NMR (250 MHz, acetonitrile- $d_3$ )  $\delta$ : 7.59 (d,  $J = 8.1$  Hz, 2H), 7.15 (d,  $J = 8.1$  Hz, 2H), 3.40-3.60 (m, 2H), 3.55 (t,  $J = 5.7$  Hz, 2H), 3.30-3.45 (m, 3H: OH and  $\text{CH}_2$ ), 3.01 (s, 9H), 2.32 (s, 3H), 1.80-1.95 (m, 2H); elemental analysis calculated for  $\text{C}_{13}\text{H}_{23}\text{NO}_4\text{S}\cdot\frac{1}{2}\text{H}_2\text{O}$ : C, 52.33; H, 8.11; N, 4.69; Found: C, 52.46; H, 8.13; N, 4.79.

**4-hydroxybutyltrimethylammonium tosylate (4OH-BTMA):** Prepared from 0.88 g (7.5 mmol) of 4-dimethylamino-1-butanol as described above. Yield: 1.30 g (4.3 mmol, 57%);  $^1\text{H}$  NMR (250 MHz, acetonitrile- $d_3$ )  $\delta$ : 7.59 (d,  $J = 8.1$  Hz, 2H), 7.15 (d,  $J = 8.1$  Hz, 2H), 3.40-3.60 (m, 2H), 3.20-3.35 (m, 3H: OH and  $\text{CH}_2$ ), 3.01 (s, 9H), 2.32 (s, 3H), 1.70-1.85 (m, 2H), 1.48 (5tet,  $J = 6.8$  Hz, 2H); elemental analysis calculated for  $\text{C}_{14}\text{H}_{25}\text{NO}_4\text{S}\cdot\frac{1}{2}\text{H}_2\text{O}$ : C, 53.82; H, 8.39; N, 4.48; Found: C, 54.34; H, 8.22; N, 4.61.

**2-hydroxypropyltrimethylammonium tosylate (2OH-PTMA):** Prepared from 2.0 g (19.4 mmol) of 1-dimethylamino-2-propanol as described above. The product is a racemic mixture of the R and S-form of 2OH-PTMA. Yield: 4.04 g (14.0 mmol, 72%);  $^1\text{H}$  NMR (250 MHz, acetonitrile- $d_3$ )  $\delta$ : 7.59 (d,  $J = 8.1$  Hz, 2H), 7.16 (d,  $J = 8.1$  Hz, 2H), 3.40-3.48 (m, 4H), 3.15-3.35 (m, 3H: OH and  $\text{CH}_2$ ), 3.10 (s, 9H), 2.33 (s, 3H), 1.14 (d,  $J = 6.3$  Hz, 3H).

**Ethyltrimethylammonium bromide (ETMA):** Prepared from 1.46 g (13.4 mmol) of 1-bromoethane as described above. Yield: 1.04 g (6.2 mmol, 46%);  $^1\text{H}$  NMR (250 MHz, acetonitrile- $d_3$ )  $\delta$ : 3.43 (q,  $J = 7.3$  Hz, 2H), 3.09 (s, 9H), 1.29 (t,  $J = 7.3$  Hz, 3H); elemental analysis calculated for  $\text{C}_5\text{H}_{14}\text{BrN}\cdot\frac{1}{2}\text{H}_2\text{O}$ : C, 33.91; H, 8.54; N, 7.91; Found: C, 34.12; H, 8.43; N, 7.94.

**Propyltrimethylammonium bromide (PTMA):** Prepared from 1.35 g (11.0 mmol) of 1-bromopropane as described above. Yield: 0.81 g (4.5 mmol, 41%);  $^1\text{H}$  NMR (250 MHz, acetonitrile- $d_3$ )  $\delta$ : 3.20-3.30 (m, 2H), 3.06 (s, 9H), 1.65-1.85 (m, 2H), 0.94 (t,  $J = 7.3$  Hz, 3H); elemental analysis calculated for  $\text{C}_6\text{H}_{16}\text{BrN}$ : C, 39.57; H, 8.86; N, 7.69; Found: C, 38.66; H, 8.96; N, 7.58.

**Butyltrimethylammonium tosylate (BTMA):** Prepared from 2.0 g (19.8 mmol) of dimethylbutylamine as described above. Yield: 4.09 g (14.3 mmol, 72%);  $^1\text{H}$  NMR (250 MHz,

acetonitrile- $d_3$ )  $\delta$ : 7.59 (d,  $J = 8.1$  Hz, 2H), 7.15 (d,  $J = 8.1$  Hz, 2H), 3.10-3.25 (m, 2H), 3.01 (s, 9H), 2.33 (s, 3H), 1.60-1.75 (m, 2H), 1.34 (6tet,  $J = 7.4$  Hz, 2H), 0.95 (t,  $J = 7.4$  Hz, 3H).

**Table S1: Observed and corrected rate/equilibrium constants of choline derivatives**

| Agonist                        | $f_2$    | $b_2$    | $E_2^{\text{obs}}$ | bkgd  | $E_2^{\text{corr}}$ | n  |
|--------------------------------|----------|----------|--------------------|-------|---------------------|----|
| ACh <sup>a</sup>               |          |          |                    |       | 25.4                |    |
| TMA <sup>a</sup>               |          |          |                    |       | 2.54                |    |
| ETMA <sup>b</sup>              | 866±165  | 2571±666 | 0.34±0.15          | 1.36  | 0.25±0.11           | 14 |
| PTMA <sup>b</sup>              | 879±227  | 2242±318 | 0.39±0.38          | 1.36  | 0.29±0.28           | 8  |
| BTMA <sup>c</sup>              | 2554±204 | 3259±340 | 0.78±0.19          | 0.32  | 2.44±0.18           | 2  |
| choline <sup>a</sup>           |          |          |                    |       | 0.05                |    |
| 3OH-PTMA <sup>b</sup>          | 564±51   | 2764±521 | 0.20±0.04          | 1.36  | 0.15±0.03           | 7  |
| 4OH-BTMA <sup>b</sup>          | 2060±375 | 2132±330 | 0.97±0.47          | 1.36  | 0.71±0.34           | 10 |
| chlorocholine <sup>b</sup>     | 652±145  | 2520±678 | 0.26±0.16          | 1.36  | 0.19±0.12           | 9  |
| 2OH-PTMA <sup>d</sup>          | 531±90   | 1843±297 | 0.29±0.11          | 14.3  | 0.02±0.01           | 8  |
| cholamine pH9.0 <sup>d</sup>   | 1580±105 | 2693±700 | 0.59±0.14          | 14.3  | 0.04±0.01           | 4  |
| cholamine pH6.1 <sup>e</sup>   | 88±18    | 2542±464 | 0.03±0.01          | 34.4  | 0.0012±0.001        | 8  |
| betaine <sup>f, -100mV</sup>   | 2288±465 | 2123±745 | 1.08±0.33          | 6.8E4 | 1.6E-5±9.3E-6       | 7  |
| betaine <sup>b+f, +100mV</sup> | 1826±300 | 2179±576 | 0.84±0.30          | 9.2E4 | 9.0E-6±3.3E-6       | 4  |

$f_2$ , diliganded opening rate constant ( $s^{-1}$ );  $b_2$ , diliganded closing rate constant ( $s^{-1}$ );  $E_2^{\text{obs}}$ , measured diliganded gating equilibrium constant ( $=f_2/b_2$ ); bkgd, the net fold-change in  $E_0$  of the background;  $E_2^{\text{corr}}$ , diliganded gating equilibrium constant corrected to the reference condition (-100 mV, wt;  $=E_2^{\text{obs}}/\text{bkgd}$ ); n, number of patches.

<sup>a</sup> Measurements from (1).

Background perturbations: <sup>b</sup>  $\epsilon$ S450A, <sup>c</sup>  $\epsilon$ S450W+ $\alpha$ D97I, <sup>d</sup>  $\epsilon$ L269F, <sup>e</sup>  $\epsilon$ L269F+ $\alpha$ D97N, <sup>f</sup>  $\alpha$ (D97A+Y127+S269I);  $V_m=+100$  mV except where specified (for fold-changes in  $E_0$  see Table S2).

**Table S2: Locations and previously-published effects of mutations on  $E_2$** 

| <b>Perturbation</b> | <b>Location</b> | <b><math>E_0^p/E_0^{wt, -0.1V}</math></b> | <b>Reference</b> |
|---------------------|-----------------|-------------------------------------------|------------------|
| $\alpha$ D97N       | Loop A          | 2.4                                       | (2)              |
| $\alpha$ D97I       | Loop A          | 0.4                                       | (2)              |
| $\alpha$ DYS        | ECD             | 68,000                                    | (3)              |
| $\epsilon$ L269F    | M2              | 179                                       | (4)              |
| $\epsilon$ S450A    | M4              | 17                                        | (5)              |
| $\epsilon$ S450W    | M4              | 9.9                                       | (5)              |
| +100 mV             | TMD             | 0.08                                      | (6)              |

All mutations change  $E_2$  by an equivalent change in  $E_0$  and do not affect  $\Delta G_B$ .

ECD: Extracellular domain, TMD, transmembrane domain; M2, M4: transmembrane segments 2 and 4; DYS:  $\alpha$ D97A+ $\alpha$ Y127F+ $\alpha$ S269I.

**Table S3: Sequence alignment of AChR and AChBP**

| <b>Channel</b>        | <b>#</b> | <b>Sequence</b>                                                       |
|-----------------------|----------|-----------------------------------------------------------------------|
| AChR mouse $\alpha 1$ | 17       | SVVRPVEDHREIVQVTVGLQLIQLINVDEVNQIVTTNVRLKQQWVDYNLKW                   |
| AChR mouse $\delta$   | 19       | KDLRPVARKEDKVDVALSLTSLNLSLKEVEETLTTNVWIDHAWVDSRLQWD                   |
| AChBP <i>Aplysia</i>  | 17       | SPMYPGPTKDDPLTVTLGFTLQDIVKADSSSTNEVDLVYYEQQRWKLNSLMWD                 |
| AChBP <i>Lymnaea</i>  | 15       | RPDVIPTQRDRPVAVSVSLKFINILEVNEITNEVDVVFQQTTWSDRTLAWN                   |
| AChR mouse $\alpha 1$ | 69       | PDDYGGVKKIHIPSEKIWRPDVVLYNNADGDFAIVKF'TKVLLDYTGHITWTP                 |
| AChR mouse $\delta$   | 71       | ANDFGNITVLRPDPDMVWLPEIVLENNNDGSFQISYACNVLVYDSGYVTWLP                  |
| AChBP <i>Aplysia</i>  | 69       | PNEYGNITDFRTSAADIWTPDITAYSSTR-PVQVLSPQIAVVTHDGSVMFIP                  |
| AChBP <i>Lymnaea</i>  | 67       | SSHSP--DQVSVPISSLWVPDLAAYNAIS-KPEVLTLPQLARVVSDEVLVLYMP                |
| AChR mouse $\alpha 1$ | 121      | PAIFKSYCEIIVTHFPFDEQNCSMKLGT <b>W</b> TYDGSVVAINPESDQP-----           |
| AChR mouse $\delta$   | 123      | PAIFRSSCPISVTYFPFDWQNCSLKFSSLKYTAKEITLSLKQEEENNRSYPI                  |
| AChBP <i>Aplysia</i>  | 120      | AQRLSFMCDPTGVDS-EEGATCAVKFGSWVYSGFEIDLKTDTDQV-----                    |
| AChBP <i>Lymnaea</i>  | 116      | SIRQRFSCDVSGVDT-ESGATCRIKIGSWTHHSREISVDPTTENS-----                    |
| AChR mouse $\alpha 1$ | 166      | -----DLSNFMESGEWVIKEARGWKHWV <b>F</b> YSCCPTTP <b>Y</b> LDITYHFVMQRLP |
| AChR mouse $\delta$   | 175      | EWIIIDPEGFTENGWEIVHRAAKLNVDPSVPMDSSTNHQDVTFYLIIRKRP                   |
| AChBP <i>Aplysia</i>  | 164      | -----DLSSYYASSKYEILSATQTRQVQHYS CCP-EPYIDVNLVVKFRERR                  |
| AChBP <i>Lymnaea</i>  | 161      | -----DSEYFSQYSRFEILDVTQKKNSVTYSCCP-EAYEDVEVSLNFRKKG                   |

In bold, residues of the aromatic triad that provide most of the  $\Delta G_B$  energy for ACh.

**Table S4: Ligand-receptor energies of 2BYQ-based AChR complexes with TMA and choline**

| <b>Energy, kcal/mol <sup>a</sup></b> | <b>TMA</b> | <b>Choline</b> |
|--------------------------------------|------------|----------------|
| Total ligand-receptor                | -9.7       | -8.4           |
| Aromatic triad <sup>b</sup>          | -6.1       | -5.5           |
| $\alpha$ W149                        | -2.2       | -2.6           |
| $\alpha$ Y190                        | -2.4       | -1.9           |
| $\alpha$ Y198                        | -1.5       | -1.0           |
| $\alpha$ Y93                         | -0.7       | -0.8           |
| $\delta$ W57                         | -0.7       | -0.6           |
| $\delta$ L121                        | -0.8       | -0.5           |

<sup>a</sup> Average of the five best ligand-receptor energies of TMA and choline

<sup>b</sup> Aromatic triad consists of  $\alpha$ W149,  $\alpha$ Y190, and  $\alpha$ Y198.

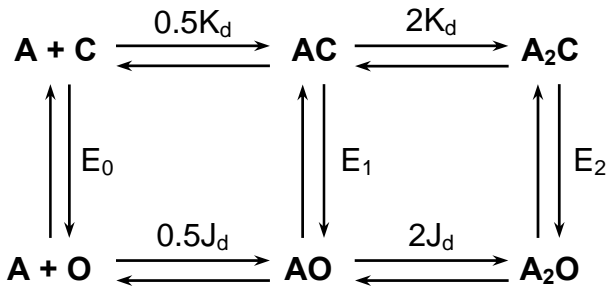

**Figure S1. Thermodynamic cycle for AChR.** A is the agonist, C is the ‘closed’ ground state ensemble (lower agonist affinity and ionic conductance) and O is the ‘open’ ground state ensemble (higher agonist affinity and ionic conductance). Next to the arrows are the salient equilibrium constants.  $E_0$  is for unliganded gating,  $E_1$  is for monoliganded gating,  $E_2$  is for diliganded gating,  $K_d$  is the dissociation constant for agonist binding to C,  $J_d$  is the dissociation constant for agonist binding to O. In adult neuromuscular AChRs the two binding sites have approximately the same low and high affinities for ACh and for choline. Without an external energy source the net energy change,  $E_2/E_0 = (K_d/J_d)^2$ . The free energy for gating provided by the affinity change for each bound agonist molecule is  $\Delta G_B$  (kcal/mol) =  $-0.59 \ln(K_d/J_d)$  or  $-0.59(\sqrt{E_2/E_0})$ .



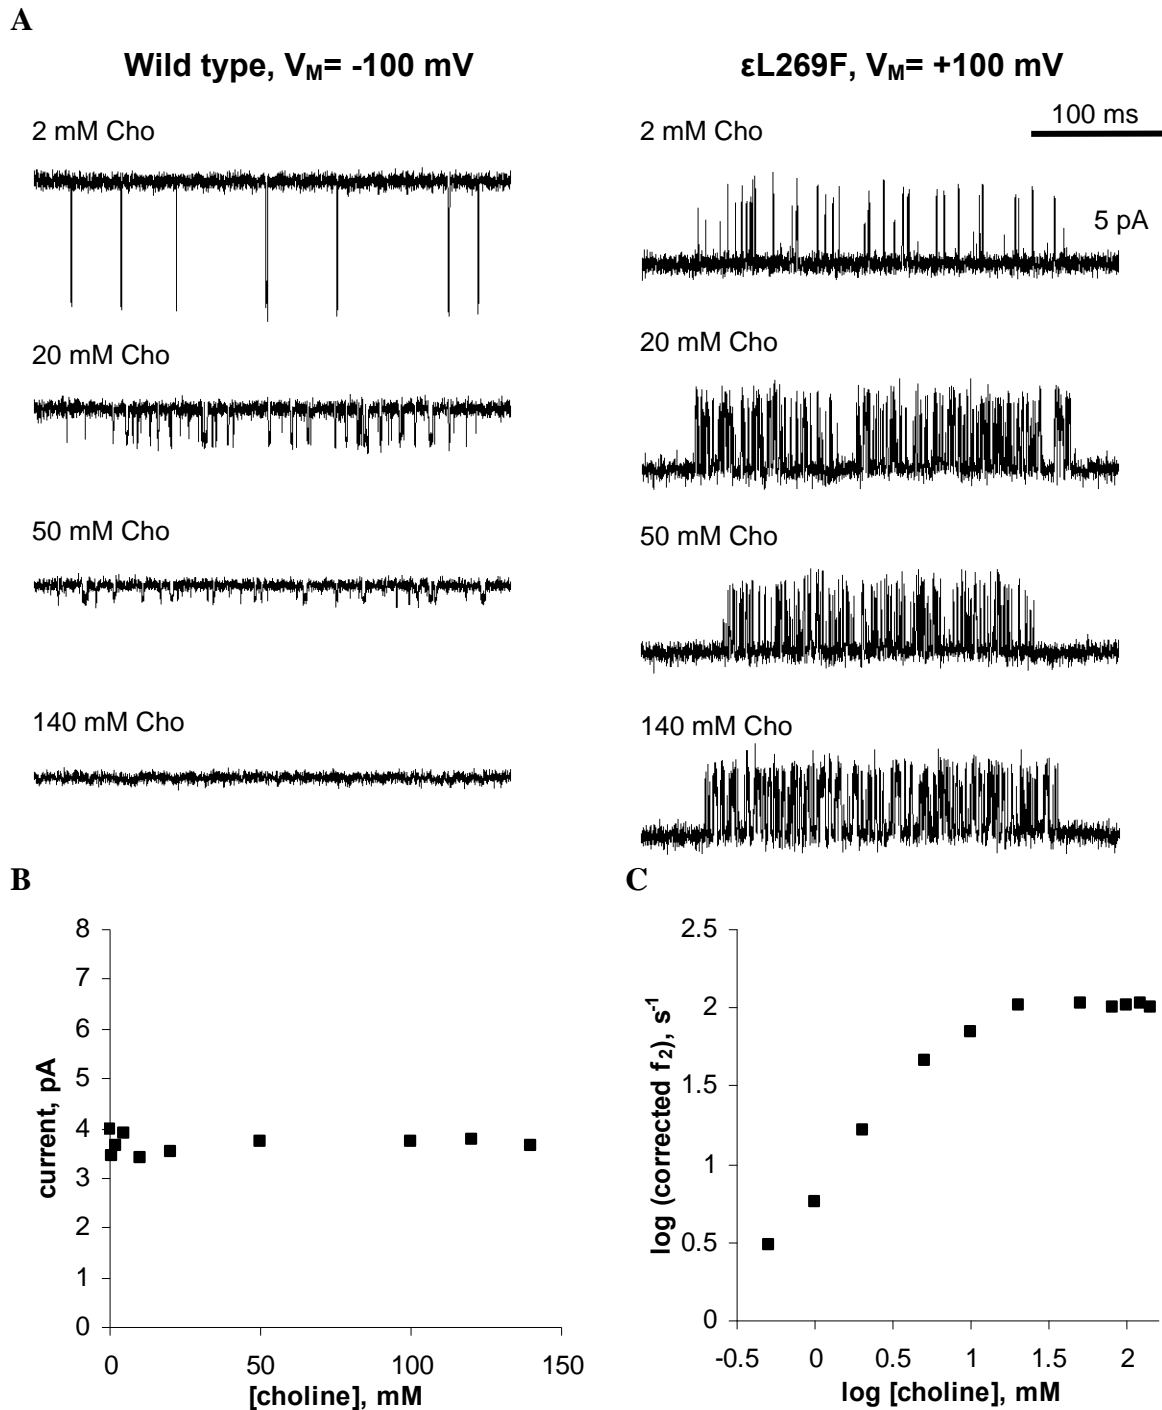

**Figure S2. AChR currents activated by choline.** **A**, AChR current clusters at different [choline] measured at a membrane potential ( $V_m$ ) of -100 mV (wt AChRs, left) or +100 mV ( $\epsilon$ L269F background, right). **B**, At +100mV, the current amplitude does not change up to 140 mM choline, indicating that channel-block by the agonist was effectively-eliminated by the +200 mV depolarization. **C**, The background- and voltage-corrected, intracluster apparent opening rate reaches a plateau  $\sim$ 20 mM choline, signifying saturation of the transmitter binding sites.

## SUPPORTING REFERENCES

1. Jadey, S. V., P. Purohit, I. Bruhova, T. M. Gregg, and A. Auerbach. 2011. Design and control of acetylcholine receptor conformational change. *Proceedings of the National Academy of Sciences of the United States of America* 108:4328-4333.
2. Chakrapani, S., T. D. Bailey, and A. Auerbach. 2003. The role of loop 5 in acetylcholine receptor channel gating. *The Journal of general physiology* 122:521-539.
3. Purohit, P., and A. Auerbach. 2009. Unliganded gating of acetylcholine receptor channels. *Proceedings of the National Academy of Sciences of the United States of America* 106:115-120.
4. Jha, A., P. Purohit, and A. Auerbach. 2009. Energy and structure of the M2 helix in acetylcholine receptor-channel gating. *Biophysical journal* 96:4075-4084.
5. Mitra, A., T. D. Bailey, and A. L. Auerbach. 2004. Structural dynamics of the M4 transmembrane segment during acetylcholine receptor gating. *Structure* 12:1909-1918.
6. Nayak, T. K., P. G. Purohit, and A. Auerbach. 2012. The intrinsic energy of the gating isomerization of a neuromuscular acetylcholine receptor channel. *The Journal of general physiology* 139:349-358.
